# Supplementary material for: Complex Effects of a Land-Use Gradient on Pollinators and Natural Enemies: Natural Habitats Mitigate the Effects of Aphid Infestation on Pollination Services
Source: MDPI journal article supplement (doi:10.3390/insects14110872), 2023-11-13
Supplement: s1 [file s1]

**Figure S1:** Proportions of natural/semi-natural area within radius of 100-2000 m around study plots.

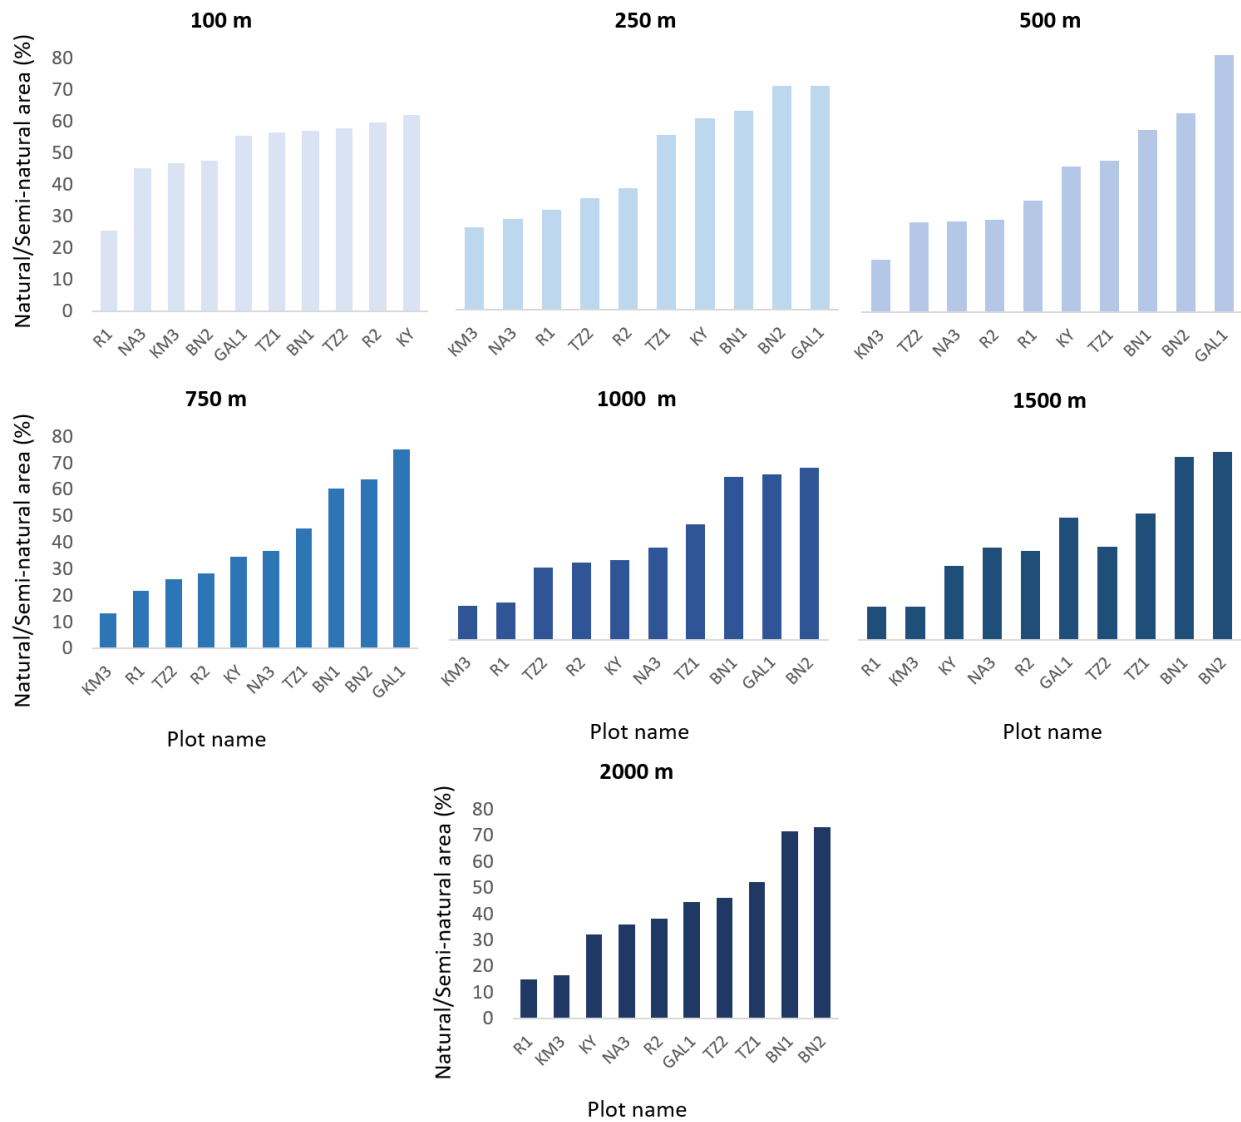

**Figure S2:** Monitoring the development of aphid mummies: A) Monitoring cages, B) Leaf on the first day, C) Mummies on the 7th day.

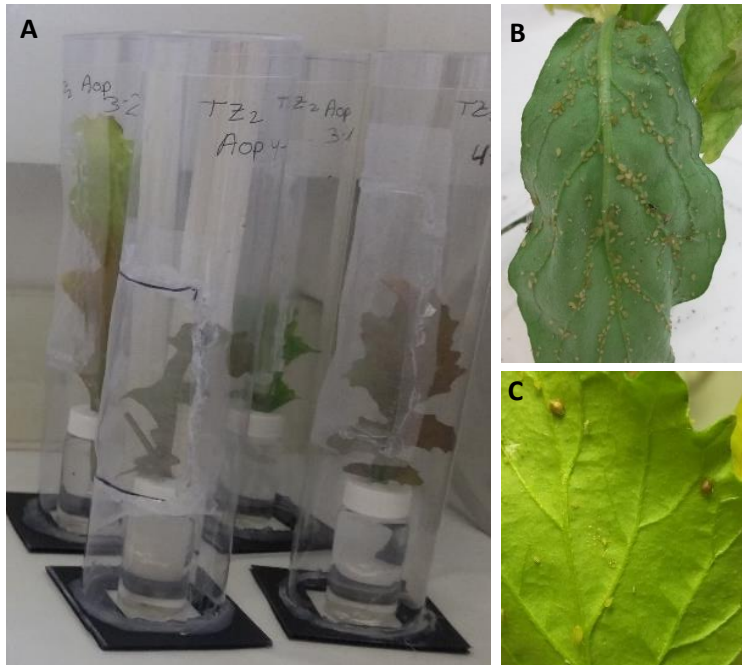

**Figure S3:** Generalized linear mixed best model estimates of the effects of landscape, local flower species richness and herbivory on wild bee activity (similar results for wild bee activity within 750 m).

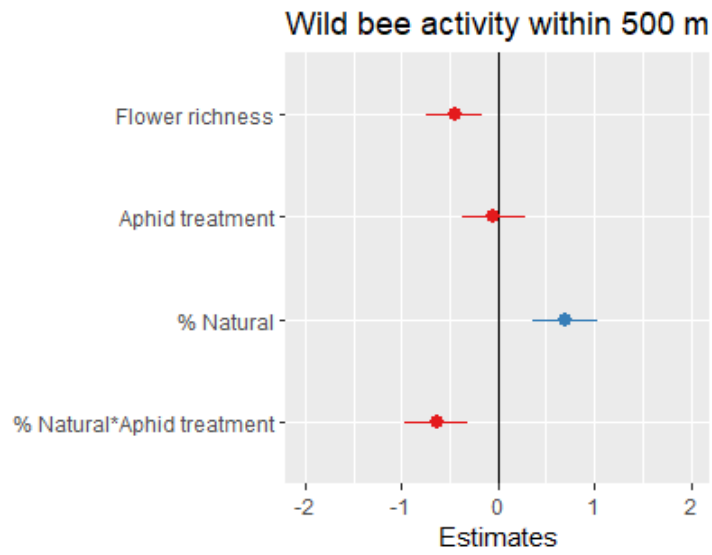

**Supplementary Results:** Results of pollinator activity models of aphid infested and un-infested phytometers: included the GAL plot: The best models for overall pollinator visitation describe an interaction between herbivory treatment and natural/semi-natural area within 500 and 750 m radius of phytometers, while a positive effect of natural area is stronger for aphid-infested plants than un-infested plants ( $\chi^2_{1 \text{ d.f.}}=7.1$ ,  $p=0.007$  and  $\chi^2_{1 \text{ d.f.}}=4.9$ ,  $p=0.026$  respectively; However, within 1000 m radius, the best model predicted a positive relationship (marginal significance) between overall pollinator activity and natural area, without significant interaction with herbivory treatment ( $\chi^2_{1 \text{ d.f.}}=3.3$ ,  $p=0.068$ ), but with a negative relationship (marginal significance) with local flower abundance ( $\chi^2_{1 \text{ d.f.}}=3.3$ ,  $p=0.068$ ). Best models include also the effect of habitat flower species richness and revealed a negative effect on pollinator activity ( $\chi^2_{1 \text{ d.f.}}=11-18$ ,  $p<0.001$ ).
