# Supplementary material for: Complex Effects of a Land-Use Gradient on Pollinators and Natural Enemies: Natural Habitats Mitigate the Effects of Aphid Infestation on Pollination Services
Source: Insects. 2023 Nov 13;14(11):872. doi: 10.3390/insects14110872 (PMC10672408; doi:10.3390/insects14110872)
Supplement: Supplementary file 1 [file insects-14-00872-s001.zip › S1 Data set_Shapira et al.xlsx]

## Sheet: Sheet1
Plot name	Sub-region	Treatment (AO-aphid-infested-open- uncaged; N-aphid-free)	Fly visits (count of flower visits /15 min)	Honeybee visits (count of flower visits/15 min)	Wild bee visits (count of flower visits/15 min)	Total pollinator visits (count of flower visits/15 min)	Phytometer flower number	Seed set (mean)	Flower abundance (local)	Flower species richness (local)	Percentage of natural/semi-natural habitats within 100 m radii	Percentage of natural/semi-natural habitats within 250 m radii	Percentage of natural/semi-natural habitats within 500 m radii	Percentage of natural/semi-natural habitats within 750 m radii	Percentage of natural/semi-natural habitats within 1000 m radii	Percentage of natural/semi-natural habitats within 1500 m radii	Percentage of natural/semi-natural habitats within 2000 m radii	Aphid parasitism rate	Aphid predation rate	Date (first day of field observations)
BN1	BGT	AO	2	0	160	162	753	5.7	546	22	56.8273	62.568	56.6528	60.4327	63.3099	71.5407	71.616	28.75	7.18869	8.3.2018
BN2	BGT	AO	3	0	47	50	224	15	454	18	47.4817	70.3132	61.8227	63.6562	66.9747	73.631	73.0384	10.5882	85.9132	19.3.2018
GAL	BGT	AO	55	12	274	341	448	9.54545	285	18	55.3094	70.4498	86.2008	75.0233	64.2249	47.765	44.6454	35.8974	72.4638	1.4.2018
KM3	KR	AO	1	35	69	105	420	16.125	100	9	46.8006	26.0103	16.2495	13.166	13.125	12.8318	16.6231	34.7059	70.5866	14.3202
KY1	KYNA	AO	52	32	55	139	677	13.8889	463	14	61.8928	60.1122	45.3552	34.4306	31.0135	28.9801	32.0793	60.1449	19.373	17.3.2018
NA3	KYNA	AO	4	0	25	29	280	30.5	317	16	44.9931	28.4696	28.2105	36.6352	35.9809	36.2049	35.7943	22.2222	97.0916	25.3.2018
R1	KR	AO	12	2	151	165	570	43.5625	604	11	25.5293	31.4832	34.8265	21.6741	14.4864	13.0161	14.8036	65.4088	60.2876	12.3.2018
R2	KR	AO	50	0	104	154	136	21.2	206	7	59.622	38.3004	28.6507	28.2682	30.1402	34.6525	38.0403	17.9487	72.1292	26.3.2018
TZ1	BGT	AO	73	0	89	162	356	26.8333	281	16	56.3251	55.0536	47.2733	45.1169	44.875	49.34	52.0373	17.9487	89.2462	27.3.2018
TZ2	BGT	AO	12	37	32	81	567	28.1875	477	18	57.5961	35.223	27.8838	26.104	27.9531	36.4689	46.0022	6.41026	NA	5.6.2018
BN1	BGT	N	3	42	139	184	684	13.5714	546	22	56.8273	62.568	56.6528	60.4327	63.3099	71.5407	71.616	NA	NA	8.3.2018
BN2	BGT	N	1	0	39	40	288	22.4	454	18	47.4817	70.3132	61.8227	63.6562	66.9747	73.631	73.0384	NA	NA	19.3.2018
GAL	BGT	N	50	1	45	96	429	12.6667	285	18	55.3094	70.4498	86.2008	75.0233	64.2249	47.765	44.6454	NA	NA	1.4.2018
KM3	KR	N	3	18	103	124	318	0	100	9	46.8006	26.0103	16.2495	13.166	13.125	12.8318	16.6231	NA	NA	14.3202
KY1	KYNA	N	38	0	54	92	325	30.5	463	14	61.8928	60.1122	45.3552	34.4306	31.0135	28.9801	32.0793	NA	NA	17.3.2018
NA3	KYNA	N	2	1	86	89	260	35.8393	317	16	44.9931	28.4696	28.2105	36.6352	35.9809	36.2049	35.7943	NA	NA	25.3.2018
R1	KR	N	16	11	131	158	516	31.4	604	11	25.5293	31.4832	34.8265	21.6741	14.4864	13.0161	14.8036	NA	NA	12.3.2018
R2	KR	N	38	0	78	116	152	21.05	206	7	59.622	38.3004	28.6507	28.2682	30.1402	34.6525	38.0403	NA	NA	26.3.2018
TZ1	BGT	N	42	12	67	121	301	44.7024	281	16	56.3251	55.0536	47.2733	45.1169	44.875	49.34	52.0373	NA	NA	27.3.2018
TZ2	BGT	N	21	16	33	70	413	27.2	477	18	57.5961	35.223	27.8838	26.104	27.9531	36.4689	46.0022	NA	NA	5.6.2018
